# Supplementary material for: An efficient lactone-to-lactam conversion for the synthesis of thiophene Pechmann lactam and the characterization of polymers thereof
Source: Royal Society of Chemistry journal article supplement (doi:10.1039/c8py00997j), 2018-01-01
Supplement: c8py00997j1.pdf [file c8py00997j1.pdf]

## **An Efficient Lactone-to-Lactam Conversion for the Synthesis of Thiophene Pechmann Lactam and Characterization of Polymers Thereof**

*Kyu Cheol Lee<sup>a,c,†</sup>, Hae Rang Lee<sup>b,d,†</sup>, So-Huei Kang<sup>a</sup>, Jungho Lee<sup>a</sup>, Young IL Park<sup>c</sup>, Seung Man Noh<sup>c</sup>, Joon Hak Oh<sup>b,\*</sup>, and Changduk Yang<sup>a,\*</sup>*

<sup>a</sup>Department of Energy Engineering, School of Energy and Chemical Engineering, Perovtronic Research Center, Low Dimensional Carbon Materials Center, Ulsan National Institute of Science and Technology (UNIST), 50 UNIST-gil, Ulju-gun, Ulsan 44919, South Korea. E-mail: yang@unist.ac.kr

<sup>b</sup>School of Chemical and Biological Engineering, Institute of Chemical Processes, Seoul National University, 1, Gwanak-ro, Gwanak-gu, Seoul 08826, South Korea. E-mail: joonhoh@snu.ac.kr

<sup>c</sup>Research Center for Green Fine Chemicals, Korea Research Institute of Chemical Technology, Ulsan 44412, South Korea.

<sup>d</sup>Department of Chemical Engineering, Pohang University of Science and Technology (POSTECH), Pohang, Gyeongbuk 37673, South Korea.

| <b>Table of Contents</b>                                                                                                                                                                                                                                                                                                                                                                                                           | <b>Page</b> |
|------------------------------------------------------------------------------------------------------------------------------------------------------------------------------------------------------------------------------------------------------------------------------------------------------------------------------------------------------------------------------------------------------------------------------------|-------------|
| <b>Fig. S1</b> <sup>1</sup> H NMR (CDCl <sub>3</sub> , 400 MHz) spectrum of compound <b>3</b> .                                                                                                                                                                                                                                                                                                                                    | S3          |
| <b>Fig. S2</b> <sup>13</sup> C NMR (CDCl <sub>3</sub> , 400 MHz) spectrum of compound <b>3</b> .                                                                                                                                                                                                                                                                                                                                   | S4          |
| <b>Fig. S3</b> <sup>1</sup> H NMR (CDCl <sub>3</sub> , 400 MHz) spectrum of compound <b>4</b> .                                                                                                                                                                                                                                                                                                                                    | S5          |
| <b>Fig. S4</b> <sup>13</sup> C NMR (CDCl <sub>3</sub> , 100 MHz) spectrum of compound <b>4</b> .                                                                                                                                                                                                                                                                                                                                   | S6          |
| <b>Fig. S5</b> <sup>1</sup> H NMR (C <sub>2</sub> D <sub>2</sub> Cl <sub>4</sub> at 80 °C, 600 MHz) spectrum of PTBPD-Th.                                                                                                                                                                                                                                                                                                          | S7          |
| <b>Fig. S6</b> <sup>1</sup> H NMR (C <sub>2</sub> D <sub>2</sub> Cl <sub>4</sub> at 80 °C, 600 MHz) spectrum of PTBPD-Th2.                                                                                                                                                                                                                                                                                                         | S8          |
| <b>Fig. S7</b> <sup>1</sup> H NMR (C <sub>2</sub> D <sub>2</sub> Cl <sub>4</sub> at 80 °C, 600 MHz) spectrum of PTBPD-Se.                                                                                                                                                                                                                                                                                                          | S9          |
| <b>Fig. S8</b> <sup>1</sup> H NMR (C <sub>2</sub> D <sub>2</sub> Cl <sub>4</sub> at 80 °C, 600 MHz) spectrum of PTBPD-Se2                                                                                                                                                                                                                                                                                                          | S10         |
| <b>Fig. S9</b> Cyclic voltammetry of TBDP-based polymers.                                                                                                                                                                                                                                                                                                                                                                          | S11         |
| <b>Fig. S10</b> Energy level diagrams of TBDP-based polymers                                                                                                                                                                                                                                                                                                                                                                       | S12         |
| <b>Fig. S11</b> DFT calculation for TBDP-based polymers at the B3LYP/6-31G* level.                                                                                                                                                                                                                                                                                                                                                 | S13         |
| <b>Fig. S12</b> AFM height images of TBPDP-based polymer films annealed at 200 °C: (a) PTBPD-Th, (b) PTBPD-Th2, (c) PTBPD-Se, and (d) PTBPD-Se2.                                                                                                                                                                                                                                                                                   | S14         |
| <b>Fig. S13</b> 2D-GIXD images of TBPDP-based polymer films without thermal treatment: (a) PTBPD-Th, (b) PTBPD-Th2, (c) PTBPD-Se, and (d) PTBPD-Se2. The corresponding GIXD diffractogram profiles: (e) in-plane and (f) out-of-plane GIXD patterns.                                                                                                                                                                               | S15         |
| <b>Table S1.</b> Crystallographic parameters of TBPDP-based polymer films without thermal treatment.                                                                                                                                                                                                                                                                                                                               | S16         |
| <b>Table S2</b> Summary of FET performance of pristine TBPDP polymer films                                                                                                                                                                                                                                                                                                                                                         | S17         |
| <b>Fig. S14</b> Transfer characteristics obtained from TBPDP-based polymer films before (blue) and after thermal treatment at various annealing temperature of 150 °C (green), 200 °C (orange), and 250 °C (red): (a) PTBPD-Th, (b) PTBPD-Th2, (c) PTBPD-Se, and (d) PTBPD-Se2.                                                                                                                                                    | S18         |
| <b>Table S3.</b> FET performance of TBPDP polymer films fabricated using various solvents.                                                                                                                                                                                                                                                                                                                                         | S19         |
| <b>Fig. S15</b> Transfer curves with three fitting lines obtained from TBPDP-based polymer films after thermal treatment at 200 °C: (a) PTBPD-Th, (b) PTBPD-Th2, (c) PTBPD-Se, and (d) PTBPD-Se2. The red lines represent the fitting line of the maximum mobility. The green lines represent the fitting lines with high gate bias. The blue lines represent ideal FET characteristics (satisfying the ideal Shockley equations). | S20         |
| <b>Table S4.</b> Summary of the calculated mobilities of TBPDP polymer-based OFETs.                                                                                                                                                                                                                                                                                                                                                | S21         |
| <b>Fig. S16</b> Thermogravimetric analysis (TGA) of all polymers.                                                                                                                                                                                                                                                                                                                                                                  | S22         |
| <b>Fig. S17</b> The differential scanning calorimetry (DSC) data of all polymers.                                                                                                                                                                                                                                                                                                                                                  | S23         |

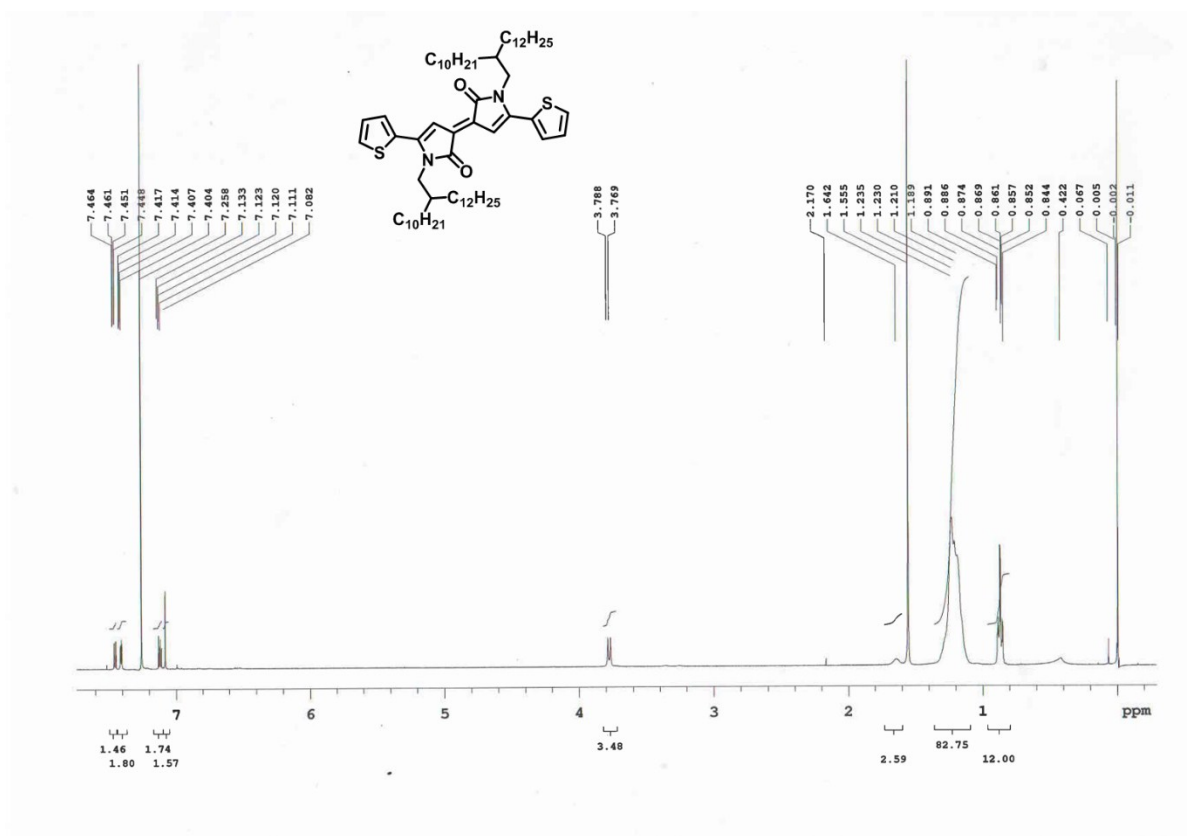

**Fig. S1** <sup>1</sup>H NMR (CDCl<sub>3</sub>, 400 MHz) spectrum of compound **3**.

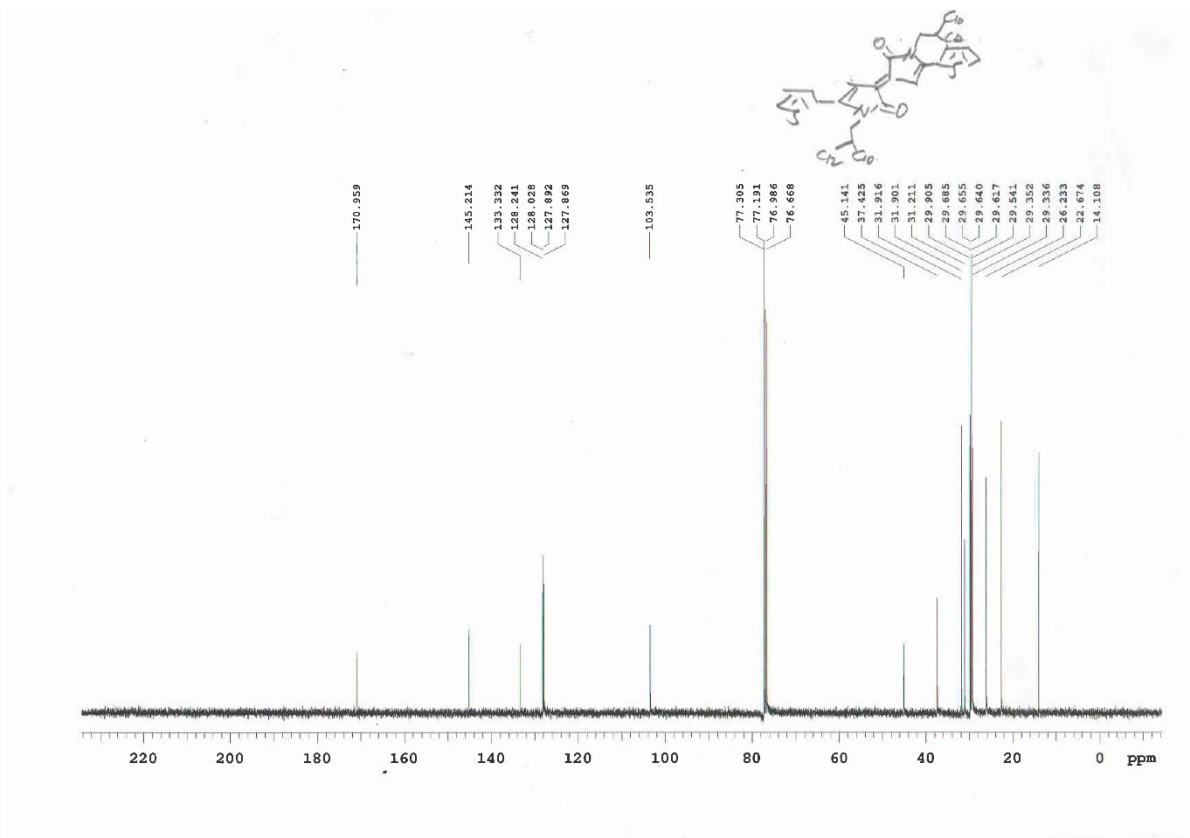

**Fig. S2**  $^{13}\text{C}$  NMR ( $\text{CDCl}_3$ , 400 MHz) spectrum of compound 3.

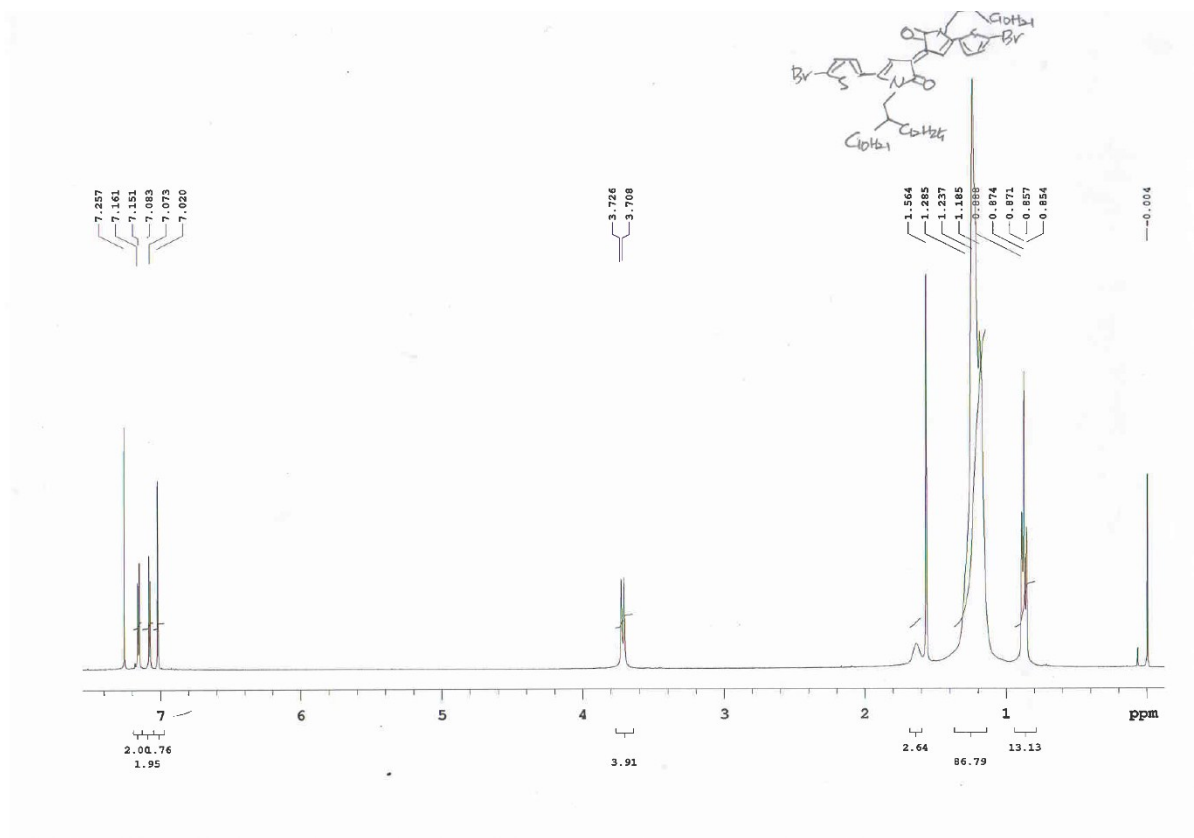

**Fig. S3** <sup>1</sup>H NMR (CDCl<sub>3</sub>, 400 MHz) spectrum of compound **4**.

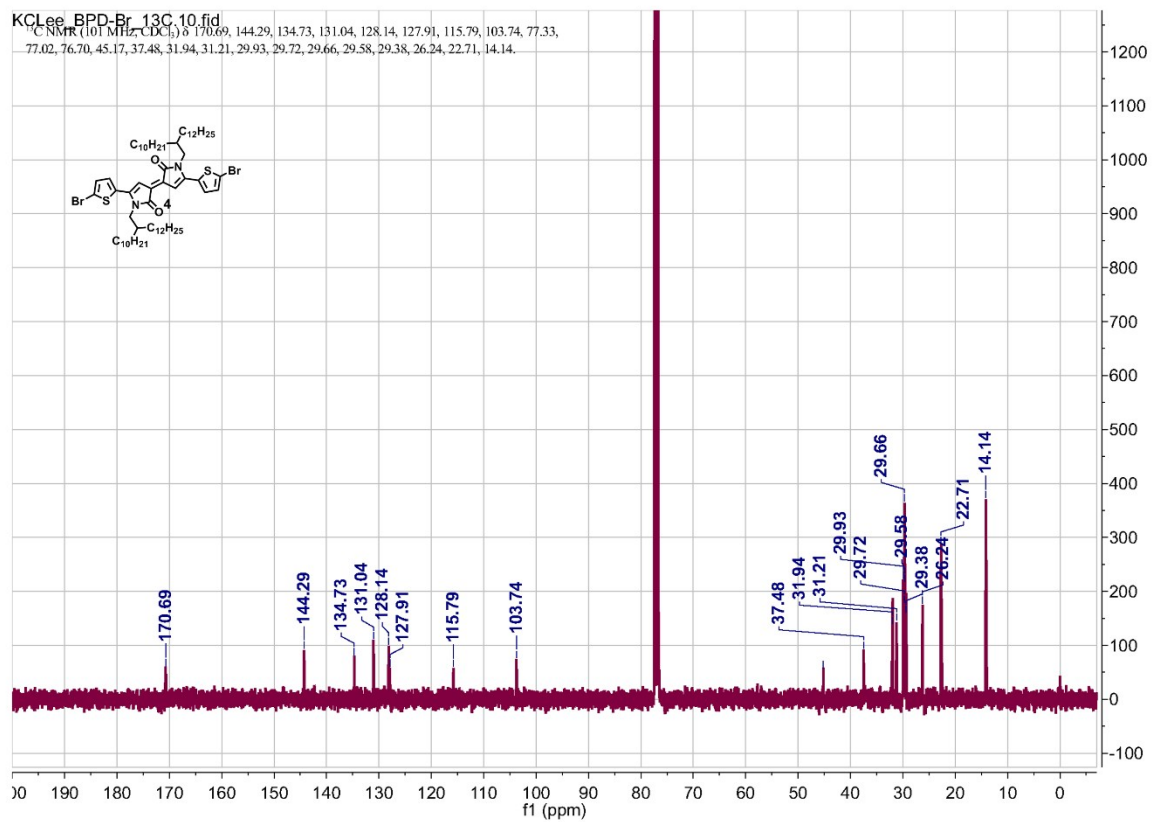

**Fig. S4** <sup>13</sup>C NMR (CDCl<sub>3</sub>, 100 MHz) spectrum of compound 4.

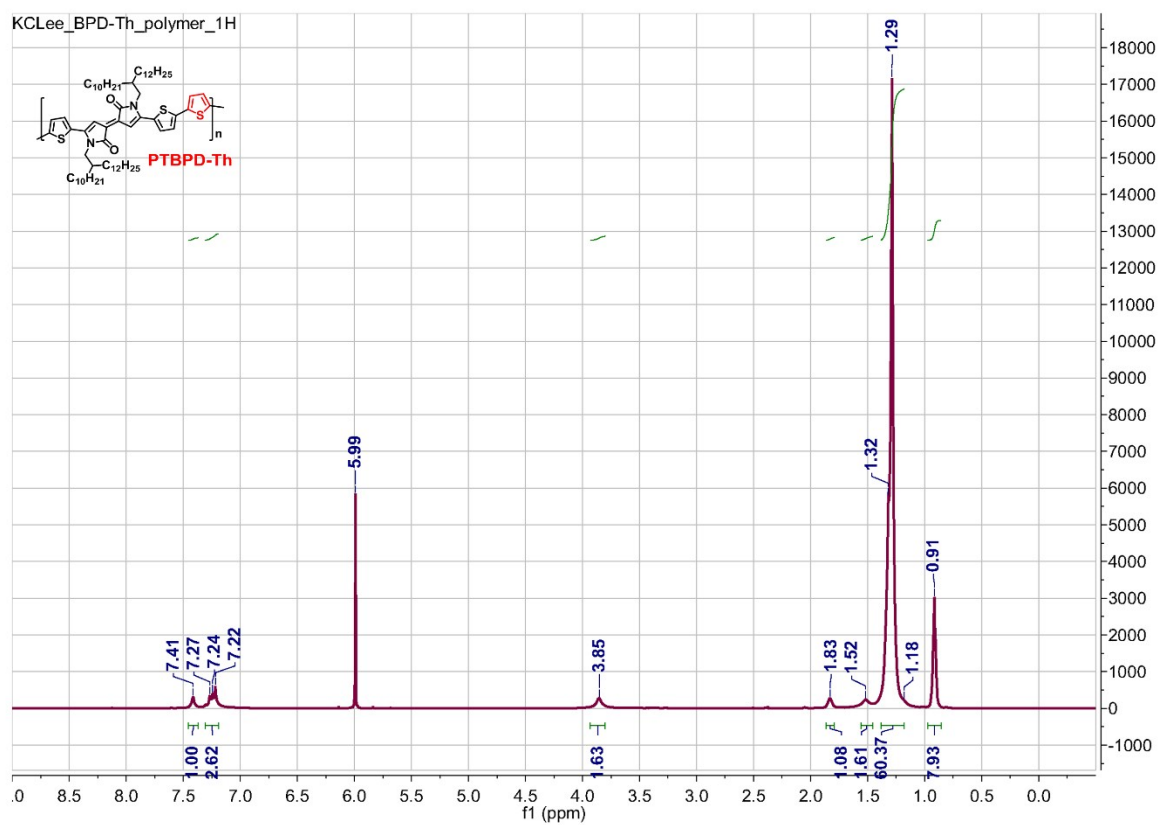

**Fig. S5** <sup>1</sup>H NMR (C<sub>2</sub>D<sub>2</sub>Cl<sub>4</sub> at 80 °C, 600 MHz) spectrum of PTBPD-Th.

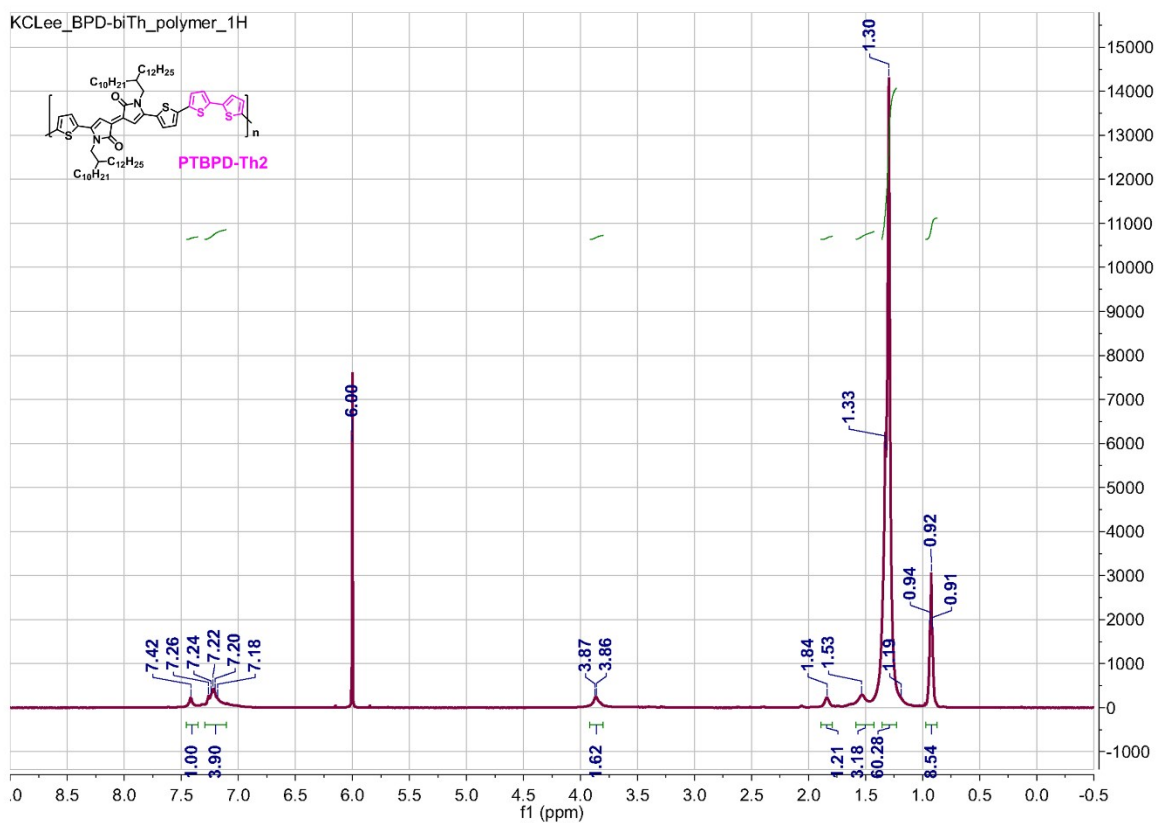

**Fig. S6**  $^1\text{H}$  NMR ( $\text{C}_2\text{D}_2\text{Cl}_4$  at  $80\text{ }^\circ\text{C}$ , 600 MHz) spectrum of PTBPD-Th2.



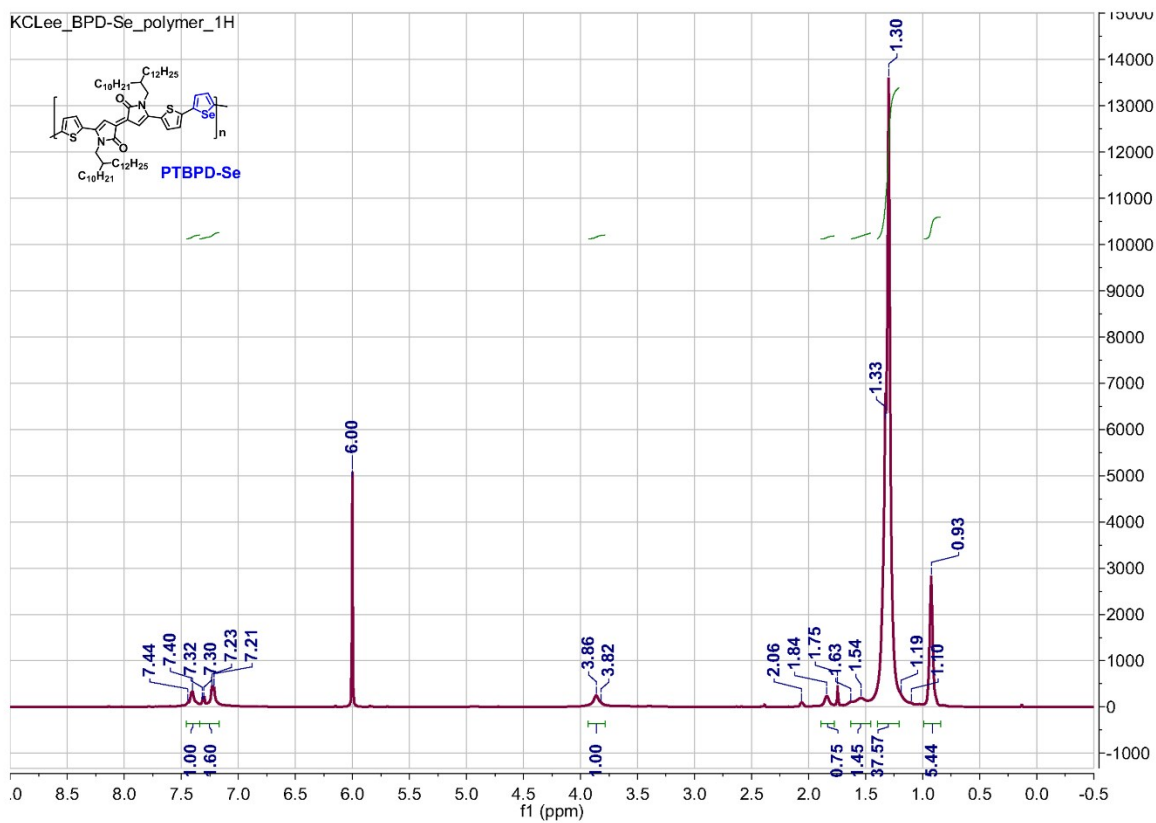

**Fig. S7** <sup>1</sup>H NMR (C<sub>2</sub>D<sub>2</sub>Cl<sub>4</sub> at 80 °C, 600 MHz) spectrum of PTBPD-Se.

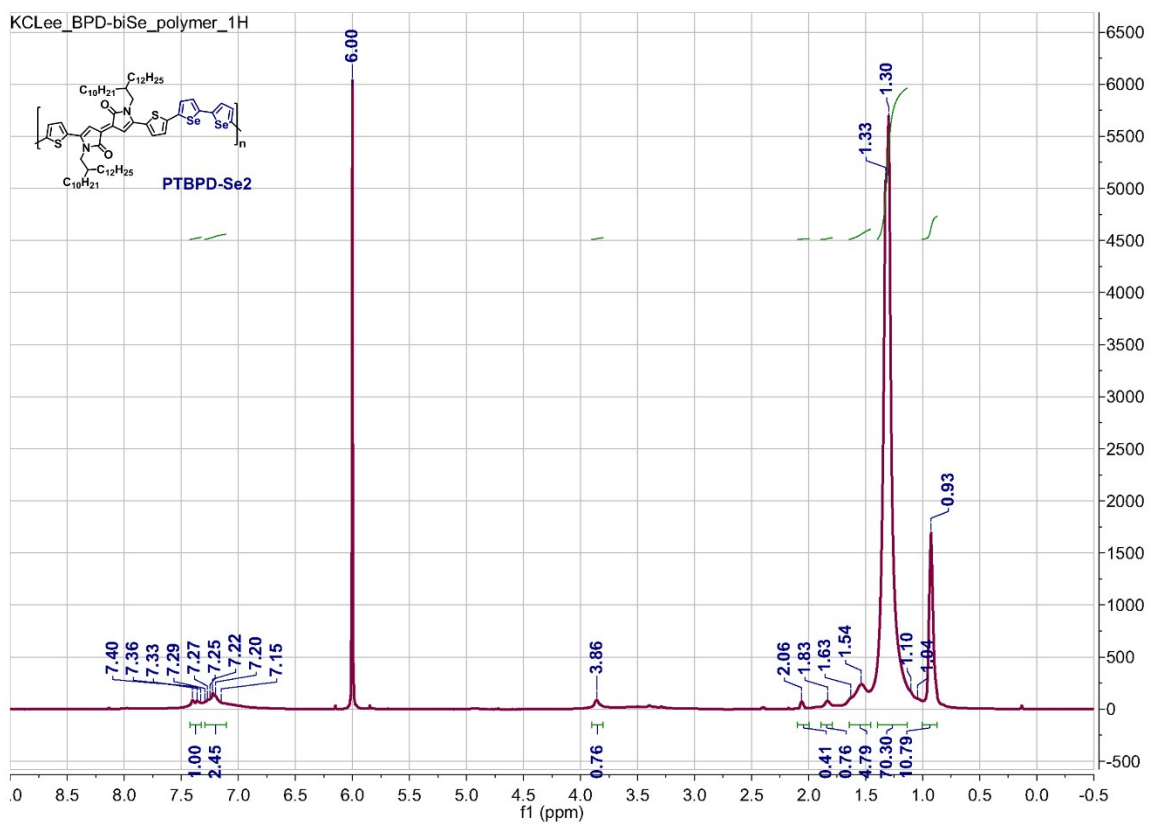

**Fig. S8** <sup>1</sup>H NMR (C<sub>2</sub>D<sub>2</sub>Cl<sub>4</sub> at 80 °C, 600 MHz) spectrum of PTBPD-Se2.

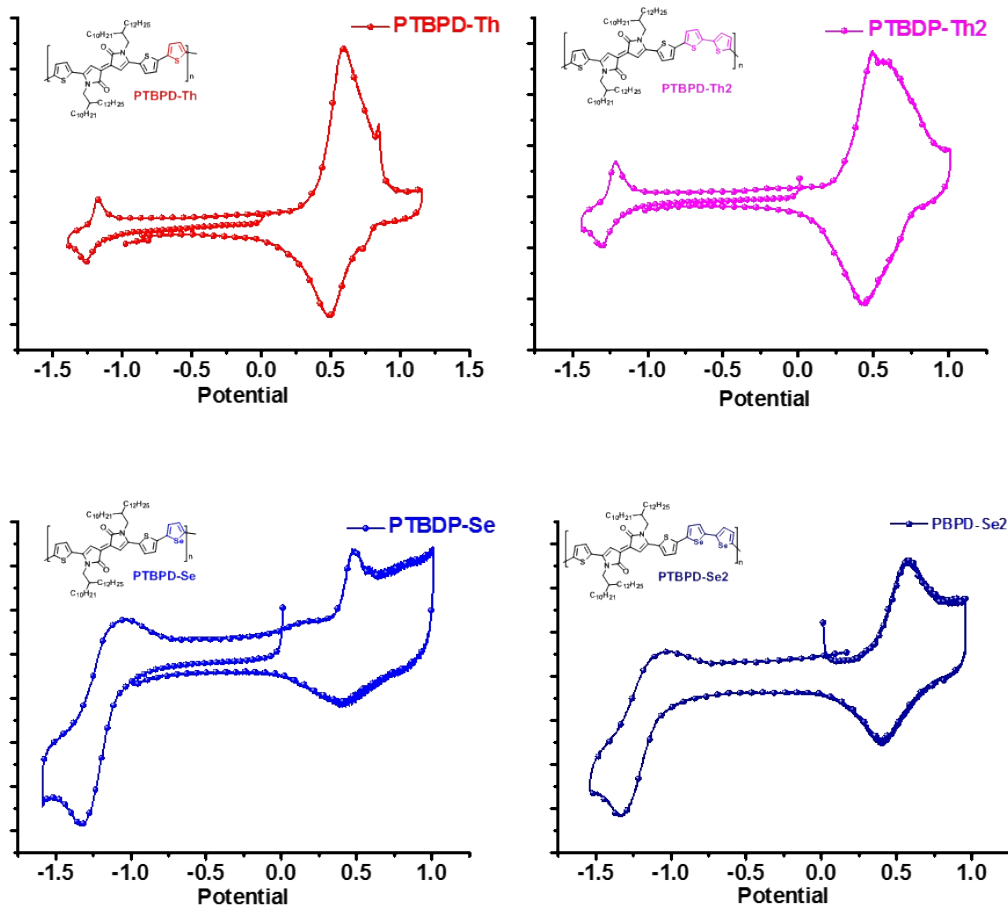

**Fig. S9** Cyclic voltammety of TBBDP-based polymers.

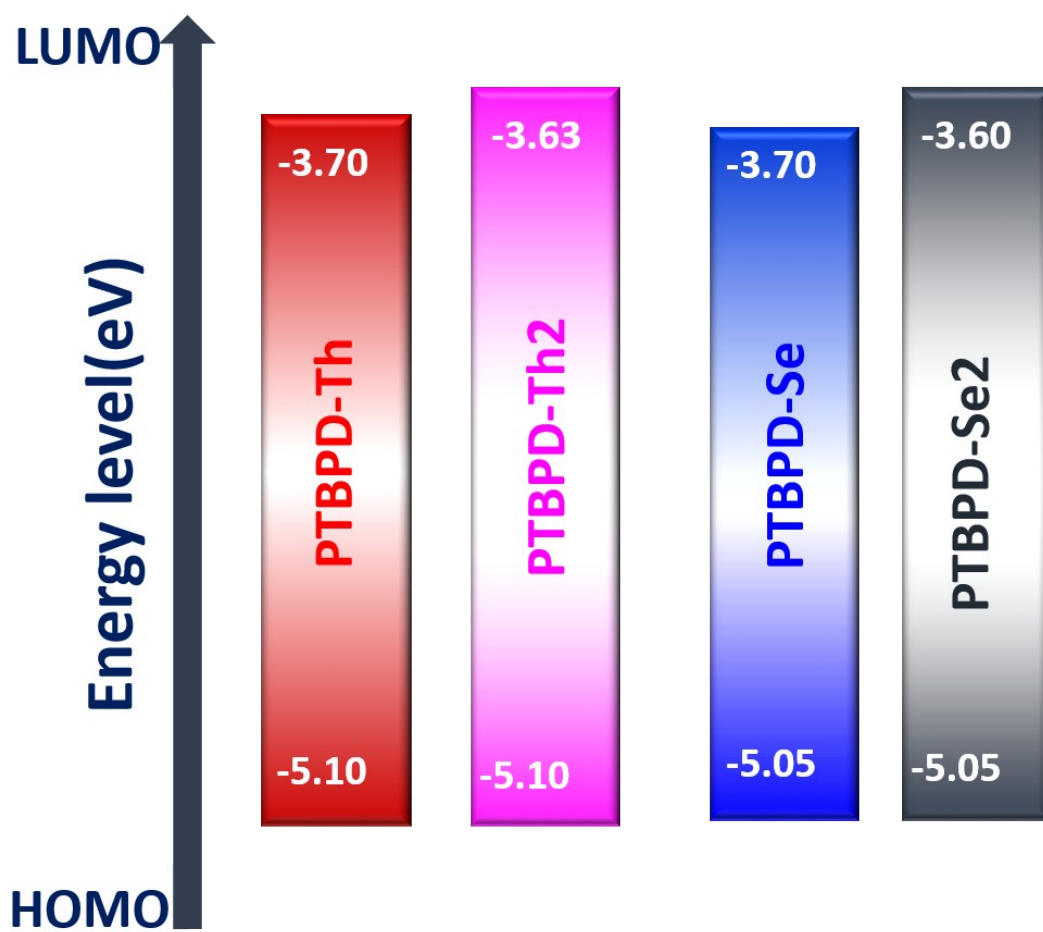

Fig. S10 Energy level diagrams of TBDP-based polymers

## PTBPD-Th

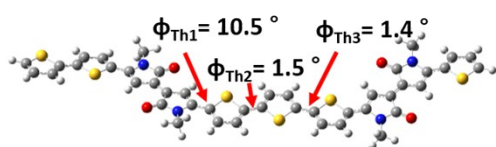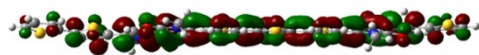

LUMO

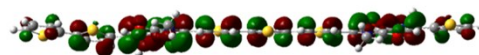

HOMO

## PTBPD-Th2

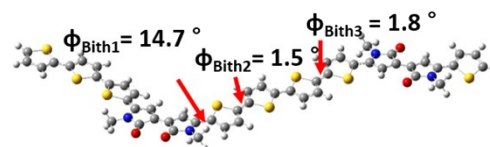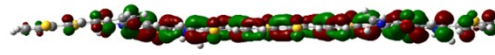

LUMO

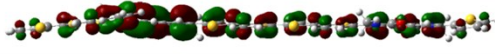

HOMO

## PTBPD-Se

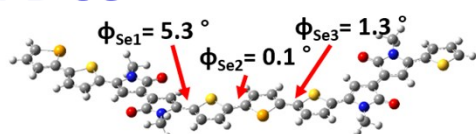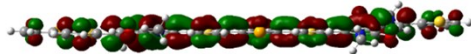

LUMO

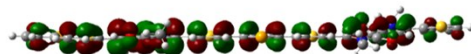

HOMO

## PTBPD-Se2

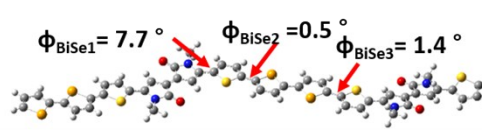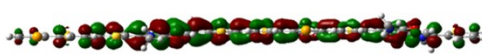

LUMO

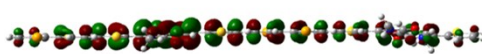

HOMO

**Fig. S11** DFT calculation for TBDP-based polymers with each dimer model at the B3LYP/6-31G\* level.

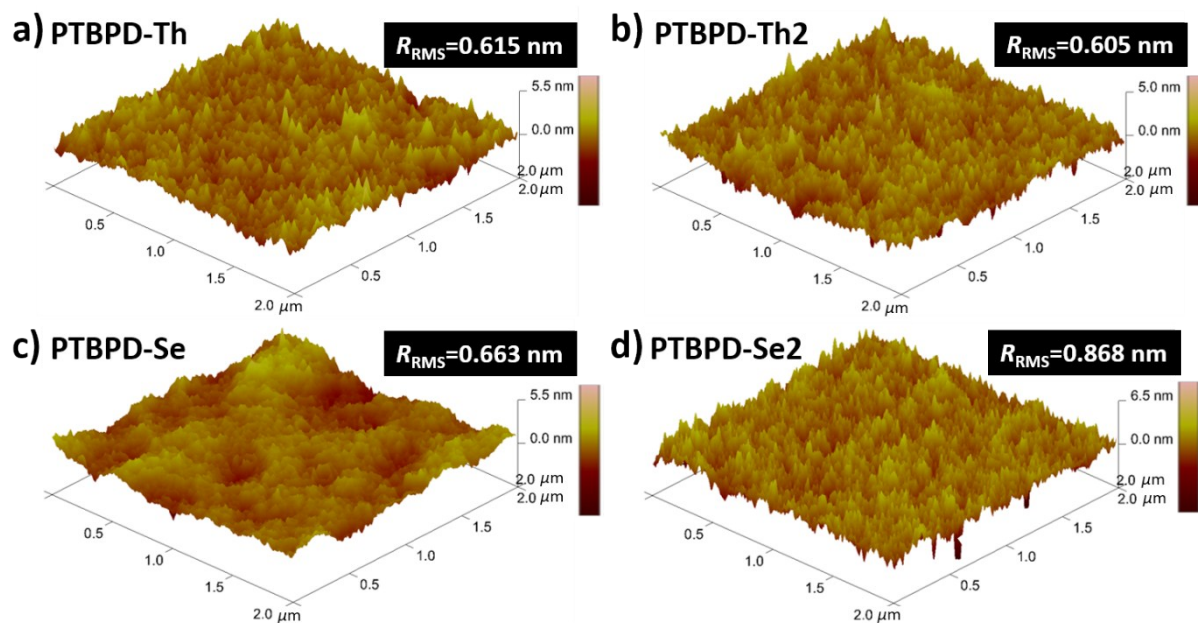

**Fig. S12** AFM height images of TBPD-based polymer films annealed at 200 °C: (a) PTBPD-Th, (b) PTBPD-Th2, (c) PTBPD-Se, and (d) PTBPD-Se2.

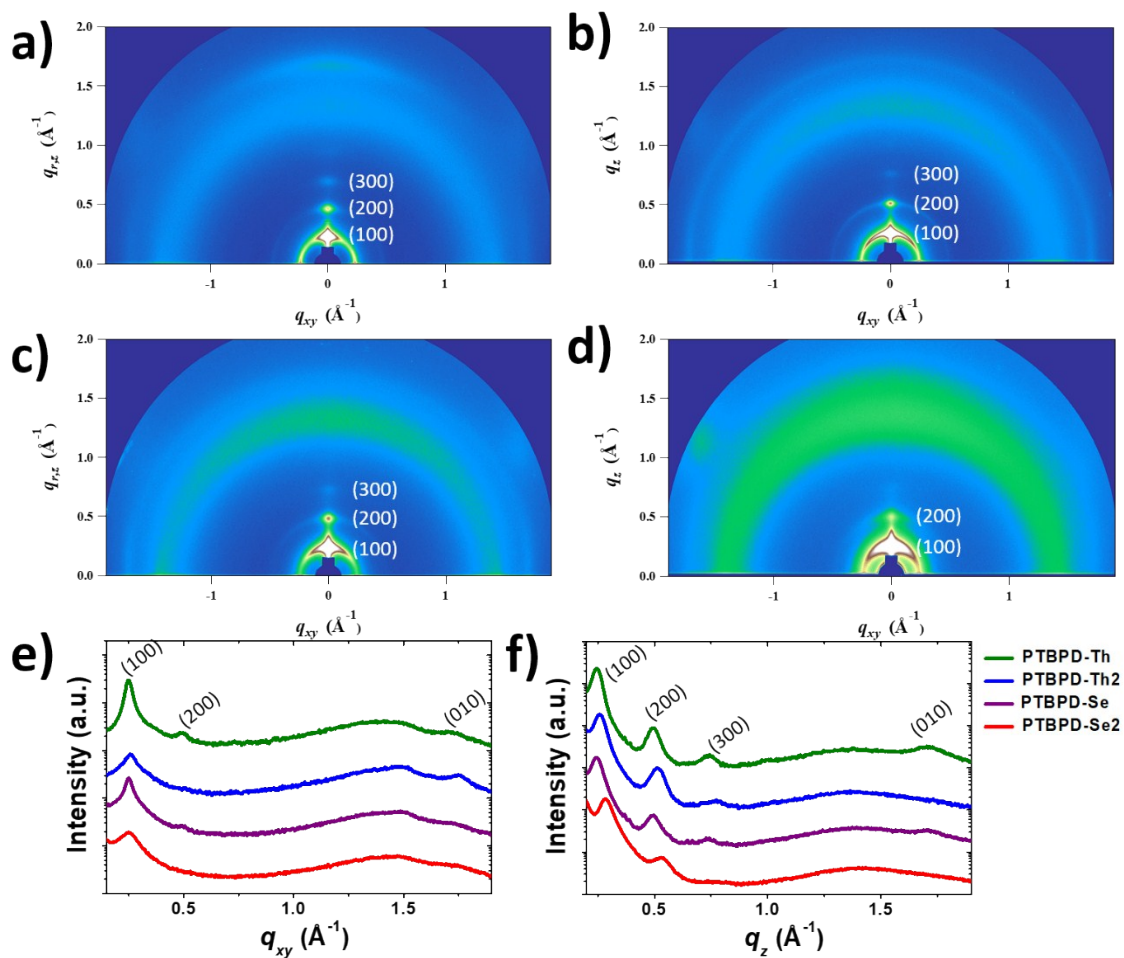

**Fig. S13** 2D-GIXD images of TBPD-based polymer films without thermal treatment: (a) PTBPD-Th, (b) PTBPD-Th2, (c) PTBPD-Se, and (d) PTBPD-Se2. The corresponding GIXD diffractogram profiles: (e) in-plane and (f) out-of-plane GIXD patterns.

**Table S1** Crystallographic parameters of as-cast TBPD-based polymer films

| Polymer   | Lamellar spacing            |                      |                        |         | $\pi$ - $\pi$ spacing          |                      |
|-----------|-----------------------------|----------------------|------------------------|---------|--------------------------------|----------------------|
|           | $q_z$ [ $\text{\AA}^{-1}$ ] | $d$ [ $\text{\AA}$ ] | $L_c$ [ $\text{\AA}$ ] | $L_c/d$ | $q_{xy}$ [ $\text{\AA}^{-1}$ ] | $d$ [ $\text{\AA}$ ] |
| PTBPD-Th  | 0.246                       | 25.6                 | 142.0                  | 5.55    | 1.72                           | 3.66                 |
| PTBPD-Th2 | 0.260                       | 24.2                 | 128.8                  | 5.32    | 1.75                           | 3.59                 |
| PTBPD-Se  | 0.245                       | 25.6                 | 142.3                  | 5.55    | — <sup>a</sup>                 | — <sup>a</sup>       |
| PTBPD-Se2 | 0.285                       | 22.0                 | 121.8                  | 5.53    | — <sup>a</sup>                 | — <sup>a</sup>       |

<sup>a</sup>Not detected



**Table S2** Summary of FET performance of solution sheared non-annealed TBPD polymer films.

| Polymer <sup>a</sup> | $\mu_{h,max}^b$ [cm <sup>2</sup> V <sup>-1</sup> s <sup>-1</sup> ] | $\mu_{h,avg}^c$ [cm <sup>2</sup> V <sup>-1</sup> s <sup>-1</sup> ] | $I_{on}/I_{off}^d$ | $V_T^e$ [V] |
|----------------------|--------------------------------------------------------------------|--------------------------------------------------------------------|--------------------|-------------|
| PTBPD-Th             | 0.25                                                               | 0.13 ( $\pm 0.093$ ) <sup>f</sup>                                  | $> 10^4$           | 18.1        |
| PTBPD-Th2            | 0.022                                                              | 0.010 ( $\pm 0.047$ )                                              | $> 10^5$           | 14.2        |
| PTBPD-Se             | 0.040                                                              | 0.027 ( $\pm 0.012$ )                                              | $> 10^4$           | 19.7        |
| PTBPD-Se2            | 0.083                                                              | 0.049 ( $\pm 0.015$ )                                              | $> 10^5$           | 18.9        |

<sup>a</sup>The FET performance of solution sheared non-annealed polymer films fabricated with 3 mg mL<sup>-1</sup> of 1,2-dichlorobenzene solution; <sup>b</sup>The maximum and <sup>c</sup>average mobility of the FET devices ( $L = 50 \mu\text{m}$  and  $W = 1000 \mu\text{m}$ ); <sup>d</sup>The on- and off-current ratio; <sup>e</sup>The average threshold voltage; <sup>f</sup>The standard deviation.

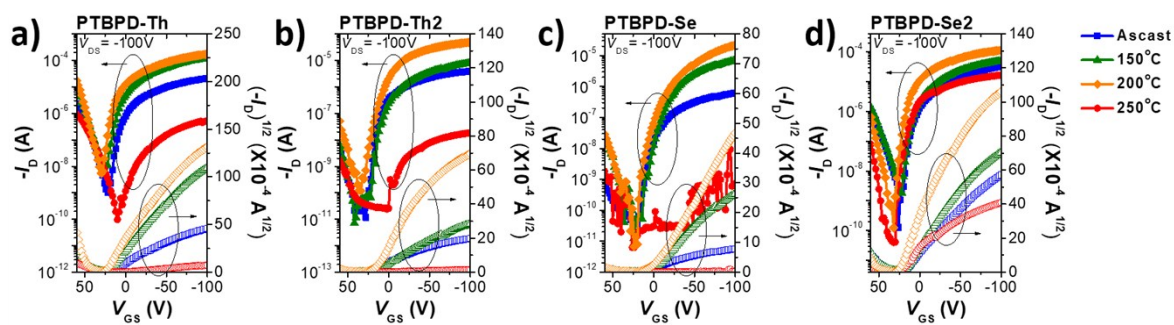

**Fig. S14** Transfer characteristics obtained from TBPD-based polymer films before (blue) and after thermal treatment at various annealing temperature of 150 °C (green), 200 °C (orange), and 250 °C (red): (a) PTBPD-Th, (b) PTBPD-Th2, (c) PTBPD-Se, and (d) PTBPD-Se2.

**Table S3** FET performance of TBPD polymer films fabricated using various solvents.

| Condition            |                      | <i>p</i> -channel                                                  |                                                                    |                    |             |
|----------------------|----------------------|--------------------------------------------------------------------|--------------------------------------------------------------------|--------------------|-------------|
| Polymer <sup>a</sup> | Solvent <sup>b</sup> | $\mu_{h,max}^c$ [cm <sup>2</sup> V <sup>-1</sup> s <sup>-1</sup> ] | $\mu_{h,avg}^d$ [cm <sup>2</sup> V <sup>-1</sup> s <sup>-1</sup> ] | $I_{on}/I_{off}^e$ | $V_T^f$ [V] |
| PTBPD-Th             | CB                   | 0.30                                                               | 0.25 ( $\pm 0.034$ ) <sup>g</sup>                                  | $> 10^3$           | 15.7        |
|                      | DCB                  | 0.46                                                               | 0.37 ( $\pm 0.066$ )                                               | $> 10^4$           | 14.7        |
| PTBPD-Th2            | CB                   | 0.030                                                              | 0.026 ( $\pm 0.0031$ )                                             | $> 10^6$           | 15.0        |
|                      | DCB                  | 0.12                                                               | 0.10 ( $\pm 0.012$ )                                               | $> 10^5$           | 11.2        |
| PTBPD-Se             | CB                   | 0.015                                                              | 0.010 ( $\pm 0.0021$ )                                             | $> 10^5$           | -1.3        |
|                      | DCB                  | 0.11                                                               | 0.066 ( $\pm 0.029$ )                                              | $> 10^5$           | 25.5        |
| PTBPD-Se2            | CB                   | 0.087                                                              | 0.070 ( $\pm 0.012$ )                                              | $> 10^5$           | 8.6         |
|                      | DCB                  | 0.28                                                               | 0.22 ( $\pm 0.044$ )                                               | $> 10^5$           | 17.5        |

<sup>a</sup>The FET performance of solution sheared polymer films annealed at 200 °C was tested in a nitrogen atmosphere;

<sup>b</sup>The polymer films were fabricated with 3 mg mL<sup>-1</sup> chlorobenzene and 1, 2-dichlorobenzene solution; <sup>c</sup>The maximum and <sup>d</sup>average mobility of the FET devices ( $L = 50 \mu\text{m}$  and  $W = 1000 \mu\text{m}$ ); <sup>e</sup>The on- and off-current ratio;

<sup>f</sup>The average threshold voltage; <sup>g</sup>The standard deviation.

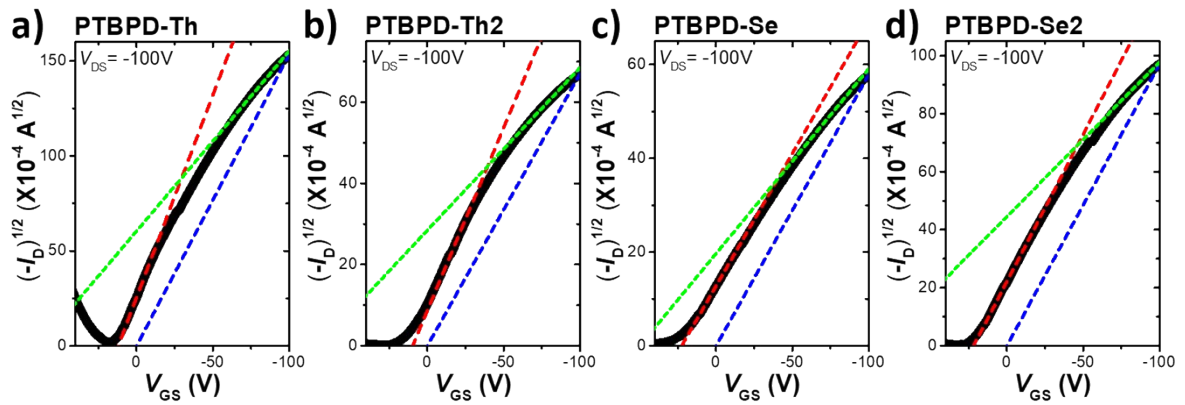

**Fig. S15** Transfer curves with three fitting lines obtained from TBPD-based polymer films after thermal treatment at 200 °C: (a) PTBPD-Th, (b) PTBPD-Th2, (c) PTBPD-Se, and (d) PTBPD-Se2. The red line represents the fitting line of the maximum mobility. The green line represents the fitting line at a high gate voltage above the kink. The blue line represents the ideal FET characteristics which satisfy the ideal Shockley equations.

**Table S4** Summary of the calculated mobilities of TBPD polymer-based OFETs.

| Polymer <sup>a</sup> | $\mu_{h,\max}^b$ [cm <sup>2</sup> V <sup>-1</sup> s <sup>-1</sup> ] | $\mu_{\text{highV}}^c$ [cm <sup>2</sup> V <sup>-1</sup> s <sup>-1</sup> ] | $\mu_{\text{eff}}^d$ [cm <sup>2</sup> V <sup>-1</sup> s <sup>-1</sup> ] | $R_{\text{sat}}^e$ [%] |
|----------------------|---------------------------------------------------------------------|---------------------------------------------------------------------------|-------------------------------------------------------------------------|------------------------|
| PTBPD-Th             | 0.46                                                                | 0.16                                                                      | 0.15                                                                    | 33.1                   |
| PTBPD-Th2            | 0.12                                                                | 0.032                                                                     | 0.048                                                                   | 39.5                   |
| PTBPD-Se             | 0.11                                                                | 0.061                                                                     | 0.067                                                                   | 63.4                   |
| PTBPD-Se2            | 0.31                                                                | 0.14                                                                      | 0.15                                                                    | 48.4                   |

<sup>a</sup>The FET performance of solution sheared polymer films fabricated with 3 mg mL<sup>-1</sup> of 1,2-dichlorobenzene solution was tested in a nitrogen atmosphere; <sup>b</sup>The maximum mobility of the FET devices; <sup>c</sup>The mobility obtained from the high gate voltage region; <sup>d</sup>The effective mobility ( $\mu_{\text{eff}} = \mu_{\text{max}} \times R_{\text{sat}}$ ); <sup>e</sup>The reliability factor.

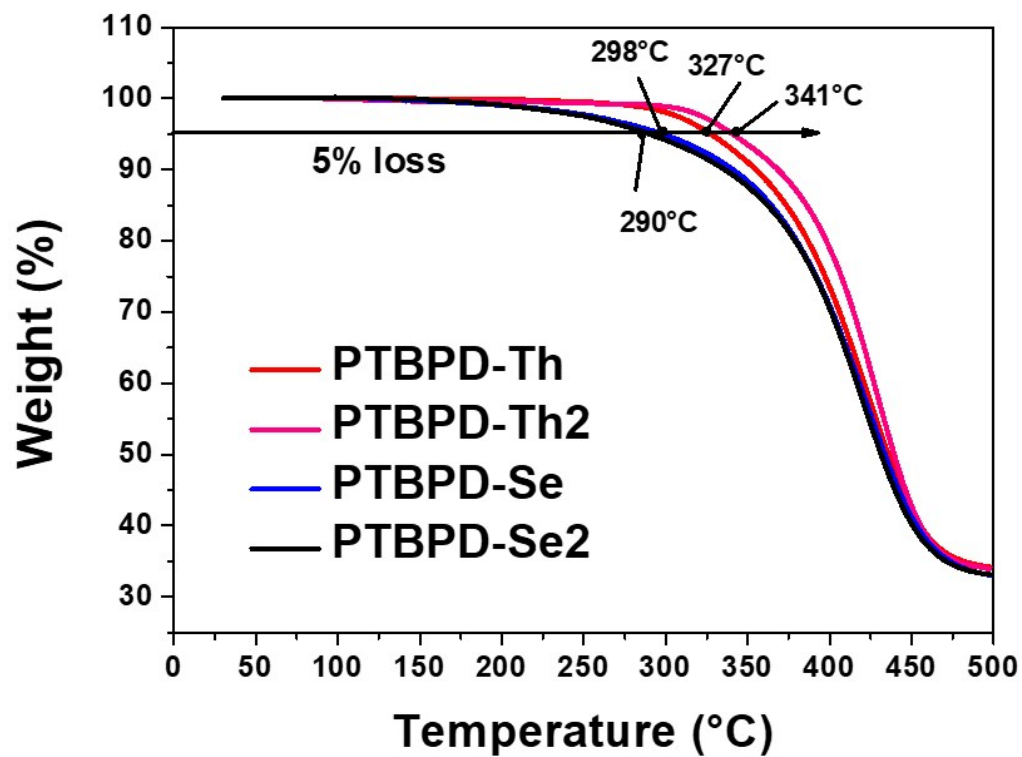

Fig. S16. Thermogravimetric analysis (TGA) of all polymers.

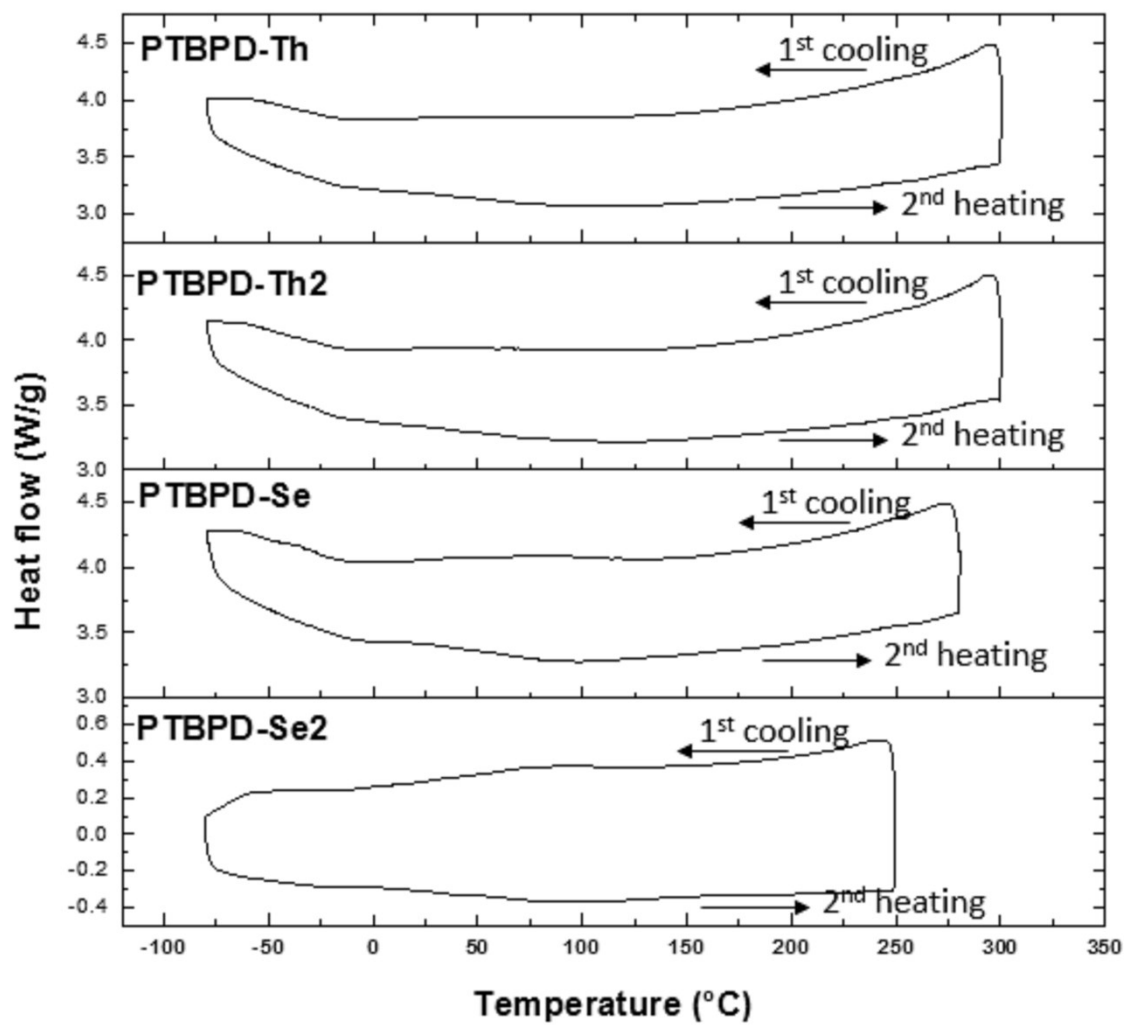

**Fig. S17** The differential scanning calorimetry (DSC) data of all polymers.
